# Supplementary material for: Pharmacogenetic Profiling in High-Risk Soft Tissue Sarcomas Treated with Neoadjuvant Chemotherapy
Source: MDPI journal article supplement (doi:10.3390/jpm12040618), 2022-04-11
Supplement: s1 [file s1]

**Supplementary Table S2.** Haplotype association analysis of *ABCC2*, *ABCB1* and *ALDH1A1* polymorphisms with survival.

| Haplotype                                            | Overall survival              |                                 | Recurrence-free survival      |                                 |
|------------------------------------------------------|-------------------------------|---------------------------------|-------------------------------|---------------------------------|
|                                                      | <i>p</i> -value<br>univariate | <i>p</i> -value<br>multivariate | <i>p</i> -value<br>univariate | <i>p</i> -value<br>multivariate |
| <b>Anthracycline pathway</b>                         |                               |                                 |                               |                                 |
| <b><i>ABCB1</i> (rs1128503 rs2032582 rs10456429)</b> |                               |                                 |                               |                                 |
| TTT                                                  | 0.243                         | 0.083                           | 0.394                         | 0.135                           |
| TTC                                                  | 0.459                         | 0.498                           | 0.540                         | 0.545                           |
| TGT                                                  | 0.059                         | <b>&lt;0.001</b>                | <b>&lt;0.001</b>              | <b>0.001</b>                    |
| CGT                                                  | <b>0.042</b>                  | <b>0.047</b>                    | 0.109                         | 0.112                           |
| CGC                                                  | 0.171                         | 0.053                           | 0.263                         | 0.092                           |
| <b><i>ABCC2</i> (rs3740066 rs2273697)</b>            |                               |                                 |                               |                                 |
| TA                                                   | 0.815                         | 0.988                           | 0.402                         | 0.275                           |
| CA                                                   | 0.544                         | 0.835                           | 0.486                         | 0.869                           |
| TG                                                   | 0.091                         | 0.185                           | 0.095                         | 0.193                           |
| CG                                                   | 0.216                         | 0.224                           | 0.167                         | 0.133                           |
| <b>Ifosfamide pathway</b>                            |                               |                                 |                               |                                 |
| <b><i>ALDH1A1</i> (rs3764435 rs168351)</b>           |                               |                                 |                               |                                 |
| CG                                                   | 0.313                         | 0.579                           | 0.363                         | 0.665                           |
| AG                                                   | 0.405                         | 0.369                           | 0.284                         | 0.228                           |
| CA                                                   | <b>0.034</b>                  | <b>0.021</b>                    | <b>0.004</b>                  | <b>0.001</b>                    |
| AA                                                   | 0.139                         | 0.094                           | <b>0.040</b>                  | <b>0.020</b>                    |

The statistically significant *p*-values are marked in bold.
