# Supplementary material for: Pharmacogenetic Profiling in High-Risk Soft Tissue Sarcomas Treated with Neoadjuvant Chemotherapy
Source: MDPI journal article supplement (doi:10.3390/jpm12040618), 2022-04-11
Supplement: s1 [file s1]

**Supplementary Table S1.** Haplotype association analysis of *ABCC2*, *ABCB1* and *ALDH1A1* polymorphisms with toxicity/response.

|                                      |                                | <b>Anthracycline pathway</b><br><i>ABCB1</i> (rs1128503 rs2032582 rs1045642) |              |       |        |       | <i>ABCC2</i> (rs3740066 rs2273697) |              |              |       | <b>Ifosfamide pathway</b><br><i>ALDH1A1</i> (rs3764435 rs168351) |              |              |       |
|--------------------------------------|--------------------------------|------------------------------------------------------------------------------|--------------|-------|--------|-------|------------------------------------|--------------|--------------|-------|------------------------------------------------------------------|--------------|--------------|-------|
|                                      |                                | TTT                                                                          | TGT          | CGT   | TGC    | CGC   | TA                                 | CA           | TG           | CG    | CG                                                               | AG           | CA           | AA    |
| <b>Grade 3-4 anaemia</b>             | Frequency affected             | 0.244                                                                        | 0.075        | 0.074 | 0.003  | 0.604 | 0.002                              | 0.075        | 0.575        | 0.348 | 0.003                                                            | 0.091        | 0.435        | 0.472 |
|                                      | Frequency unaffected           | 0.303                                                                        | 0.013        | 0.066 | 0.013  | 0.605 | 0.016                              | 0.260        | 0.339        | 0.384 | 0.013                                                            | 0.105        | 0.459        | 0.422 |
|                                      | <i>p</i> -value (univariate)   | 0.555                                                                        | 0.098        | 0.888 | 0.643  | 0.999 | 0.580                              | <b>0.046</b> | <b>0.034</b> | 0.742 | 0.619                                                            | 0.818        | 0.804        | 0.621 |
|                                      | <i>p</i> -value (multivariate) | 0.258                                                                        | <b>0.02</b>  | 0.917 | 0.601  | 0.549 | 0.79                               | 0.165        | 0.104        | 0.683 | 0.481                                                            | 0.846        | 0.618        | 0.399 |
| <b>Grade 3-4 thrombo-cytopenia</b>   | Frequency affected             | 0.379                                                                        | 0.01         | 0.111 | 0      | 0.5   | 0                                  | 0.063        | 0.5          | 0.438 | 0.006                                                            | 0.057        | 0.432        | 0.506 |
|                                      | Frequency unaffected           | 0.269                                                                        | 0.033        | 0.060 | 0.013  | 0.626 | 0.015                              | 0.241        | 0.381        | 0.364 | 0.012                                                            | 0.107        | 0.457        | 0.424 |
|                                      | <i>p</i> -value (univariate)   | 0.344                                                                        | 0.584        | 0.432 | 0.633  | 0.320 | 0.627                              | 0.109        | 0.371        | 0.574 | 0.834                                                            | 0.527        | 0.850        | 0.536 |
|                                      | <i>p</i> -value (multivariate) | 0.989                                                                        | 0.786        | 0.361 | 0.995  | 0.914 | 0.996                              | 0.237        | 0.219        | 0.938 | 0.708                                                            | 0.508        | 0.609        | 0.318 |
| <b>Grade 3-4 neutropenia</b>         | Frequency affected             | 0.288                                                                        | 0.038        | 0.092 | 0.001  | 0.580 | 0.021                              | 0.164        | 0.479        | 0.336 | 0.021                                                            | 0.108        | 0.447        | 0.424 |
|                                      | Frequency unaffected           | 0.287                                                                        | 0.020        | 0.043 | 0.020  | 0.630 | 0.002                              | 0.269        | 0.310        | 0.419 | 0.004                                                            | 0.096        | 0.459        | 0.441 |
|                                      | <i>p</i> -value (univariate)   | 0.989                                                                        | 0.587        | 0.314 | 0.345  | 0.601 | 0.380                              | 0.197        | 0.083        | 0.390 | 0.331                                                            | 0.816        | 0.888        | 0.838 |
|                                      | <i>p</i> -value (multivariate) | 0.981                                                                        | 0.411        | 0.247 | 0.511  | 0.422 | 0.695                              | 0.398        | 0.104        | 0.227 | 0.501                                                            | 0.787        | 0.869        | 0.877 |
| <b>Febrile neutropenia</b>           | Frequency affected             | 0.289                                                                        | 0.028        | 0.099 | 0.0009 | 0.584 | 0.026                              | 0.074        | 0.524        | 0.376 | 0.025                                                            | 0.100        | 0.496        | 0.379 |
|                                      | Frequency unaffected           | 0.287                                                                        | 0.031        | 0.050 | 0.016  | 0.617 | 0.003                              | 0.303        | 0.319        | 0.374 | 0.004                                                            | 0.102        | 0.432        | 0.461 |
|                                      | <i>p</i> -value (univariate)   | 0.982                                                                        | 0.931        | 0.331 | 0.447  | 0.738 | 0.305                              | <b>0.006</b> | <b>0.040</b> | 0.984 | 0.262                                                            | 0.968        | 0.469        | 0.348 |
|                                      | <i>p</i> -value (multivariate) | 0.832                                                                        | 0.781        | 0.240 | 0.621  | 0.652 | 0.474                              | <b>0.035</b> | <b>0.040</b> | 0.697 | 0.487                                                            | 0.93         | 0.574        | 0.429 |
| <b>Vomiting</b>                      | Frequency affected             | 0                                                                            | 0            | 0     | 0      | 1     | 0.012                              | 0.208        | 0.398        | 0.382 | 0                                                                | 0            | 0            | 1     |
|                                      | Frequency unaffected           | 0.293                                                                        | 0.030        | 0.070 | 0.011  | 0.597 | 0.030                              | 0.829        | 0.048        | 1.062 | 0.011                                                            | 0.103        | 0.460        | 0.425 |
|                                      | <i>p</i> -value (univariate)   | 0.365                                                                        | 0.804        | 0.699 | 0.883  | 0.248 | 0.862                              | 0.363        | 0.827        | 0.303 | 0.881                                                            | 0.632        | 0.194        | 0.104 |
|                                      | <i>p</i> -value (multivariate) | 0.996                                                                        | 0.999        | 0.988 | 0.995  | 0.995 | 0.976                              | 0.491        | 0.833        | 0.57  | 1                                                                | 0.997        | 0.995        | 0.993 |
| <b>Grade 3-4 transaminitis</b>       | Frequency affected             | 0.167                                                                        | 0            | 0     | 0      | 0.833 | 0.009                              | 0.158        | 0.658        | 0.175 | 0                                                                | 0.333        | 0            | 0.667 |
|                                      | Frequency unaffected           | 0.290                                                                        | 0.032        | 0.074 | 0.011  | 0.593 | 0.013                              | 0.221        | 0.381        | 0.385 | 0.012                                                            | 0.085        | 0.481        | 0.422 |
|                                      | <i>p</i> -value (univariate)   | 0.514                                                                        | 0.657        | 0.489 | 0.794  | 0.241 | 0.928                              | 0.716        | 0.178        | 0.303 | 0.790                                                            | <b>0.044</b> | <b>0.021</b> | 0.237 |
|                                      | <i>p</i> -value (multivariate) | 0.896                                                                        | 0.995        | 0.987 | 0.995  | 0.376 | 0.924                              | 0.609        | 0.283        | 0.445 | 0.997                                                            | 0.121        | 0.994        | 0.424 |
| <b>Haemorrhagic cystitis</b>         | Frequency affected             |                                                                              |              |       |        |       |                                    |              |              |       | 0                                                                | 0.25         | 0.25         | 0.5   |
|                                      | Frequency unaffected           |                                                                              |              |       |        |       |                                    |              |              |       | 0.011                                                            | 0.091        | 0.467        | 0.431 |
|                                      | <i>p</i> -value (univariate)   |                                                                              |              |       |        |       |                                    |              |              |       | 0.829                                                            | 0.289        | 0.392        | 0.783 |
|                                      | <i>p</i> -value (multivariate) |                                                                              |              |       |        |       |                                    |              |              |       | 0.997                                                            | 0.387        | 0.463        | 0.804 |
| <b>Pathological response &gt;90%</b> | Frequency affected             | 0.242                                                                        | 0.068        | 0.065 | 0.002  | 0.623 | 0.031                              | 0.094        | 0.406        | 0.469 | 0.024                                                            | 0.136        | 0.416        | 0.424 |
|                                      | Frequency unaffected           | 0.339                                                                        | 0            | 0.065 | 0.015  | 0.582 | 0.003                              | 0.247        | 0.397        | 0.353 | 0.004                                                            | 0.084        | 0.472        | 0.441 |
|                                      | <i>P</i> -value (univariate)   | 0.331                                                                        | <b>0.033</b> | 0.996 | 0.567  | 0.698 | 0.264                              | <b>0.077</b> | 0.928        | 0.281 | 0.288                                                            | 0.342        | 0.538        | 0.847 |
|                                      | <i>P</i> -value (multivariate) | 0.269                                                                        | 0.995        | 0.810 | 0.528  | 0.503 | 0.511                              | 0.2          | 0.783        | 0.471 | 0.544                                                            | 0.217        | 0.415        | 0.936 |

The statistically significant *p*-values are marked in bold.
